# Supplementary material for: The effect of staphylococcal mastitis including resistant strains on serum procalcitonin, neopterin, acute phase response and stress biomarkers in Holstein dairy cows
Source: PeerJ. 2021 May 31;9:e11511. doi: 10.7717/peerj.11511 (PMC8174151; doi:10.7717/peerj.11511)
Supplement: Supplemental Information 1 — The changes in the examined biomarkers in the serum of Holstein Dairy Cows with clinical Staphylococcal Mastitis. [file peerj-09-11511-s001.xlsx]

## Sheet: Sheet1
Group	IL-1β	IFN- ϒ	IL-8	TNF-α-1	MDA-1	GSH-px	SOD	HP	SAA	Procalcitonin	Neopterin	SCC x 10³/ml	Isolated Bacteria	stage of lactation
0	102.36	54.23	77.8	0.41	7.5	39.5	18.23	0	23.22	50.54	3.32	138		3
0	104.22	55.23	79.36	0.42	6.92	40.36	17.26	0.01	26.25	54.12	3.91	155		2
0	108.23	53.26	80.21	0.43	7.24	42.36	15.23	0.06	24.36	53.23	3.71	141		1
0	100.25	50.26	0	0.46	6.58	45.36	17.26	0.05	22.36	50.87	3.34	151		3
0	101.36	52.36	77.36	0.42	7.65	46.23	18.23	0.09	23.45	52.27	3.96	149		5
0	106.23	52.36	80.21	0.41	7.84	44.26	17.23	0.09	25.36	50.65	4.12	139		4
0	104.25	50.23	79.25	0.45	6.93	39.26	15.24	0.08	23.02	51.88	4.15	145		1
0	101.36	55.14	78.45	0.46	7.42	40.36	14.26	0	22.36	52.62	3.85	148		4
0	100.23	51.23	77.9	0.42	7.25	41.26	15.23	0.09	22.64	50.45	3.77	155		5
0	102.45	52.24	79.26	0.47	8.24	41.78	17.26	0.06	23.77	52.64	4.21	157		3
0	105.36	50.36	80.11	0.45	6.35	43.26	16.23	0.05	21.36	51.91	4.12	139		3
0	102.36	54.33	0	0.45	6.98	42.42	15.21	0.06	24.36	52.56	3.67	144		4
0	106.25	53.22	77.98	0.47	7.12	40.11	14.26	0.08	23.69	53.59	3.55	148		5
0	100.46	53.66	79.26	0.43	6.54	39.26	17.26	0	22.74	51.22	3.28	138		4
0	102.46	53.32	0	0.43	6.48	41.47	15.27	0.06	23.46	50.56	3.77	145		4
0	104.27	52.23	78.36	0.43	6.94	40.34	17.28	0.01	26.75	54.16	3.71	155		2
0	103.36	51.36	88.11	0.45	6.45	43.76	16.44	0.07	21.86	51.31	4.11	138		3
0	102.37	52.13	80.45	0.44	7.52	42.36	14.96	0	22.77	52.66	3.55	149		4
0	100.22	54.25	77.44	0.47	7.54	39.33	18.45	0	23.44	50.57	4.22	138		3
0	108.36	52.14	80.22	0.46	8.36	40.36	16.24	0.09	21.45	51.88	3.79	139		1
1	630.25	133.26	125.23	2.51	19.36	22.36	7.25	1.33	140.26	198.25	9.36	616	SA	3
1	650.36	140.36	120.36	2.63	20.36	20.32	6.25	1.22	141.46	190.26	10.26	774	SA	4
1	680.36	150.36	133.25	2.58	22.36	19.25	5.21	1.41	24.15	187.36	11.47	912	SA	5
1	104.22	111.23	163.34	2.74	16.43	18.26	5.44	0.08	135.26	165.26	8.26	620	SA	3
1	630.25	136.25	132.36	0.51	22.36	17.22	6.12	0	22.66	189.02	9.48	771	SA	4
1	455.23	52.36	170.23	0.48	17.34	20.32	5.21	1.32	149.55	166.25	7.26	763	SA	4
1	550.23	55.26	165.23	0.63	18.22	18.23	4.25	1.35	145.26	155.26	8.26	760	MERSA	4
1	420.13	115.23	177.12	2.63	15.23	19.34	3.26	0.09	25.16	159.59	7.48	750	SA	4
1	689.12	136.25	120.36	2.74	20.36	18.26	4.25	0.08	150.11	197.26	11.28	745	MERSA	4
1	661.36	134.15	110.26	2.83	23.45	20.36	5.21	1.63	148.36	230.25	12.69	739	SA	4
1	470.32	81.23	159.36	2.84	17.28	17.26	6.25	1.32	147.12	170.32	8.59	781	SA	4
1	640.11	141.21	126.25	2.63	23.25	15.26	8.26	1.22	135.26	198.26	10.69	771	SA	4
1	511.23	55.26	162.34	0.51	18.33	19.36	4.36	1.33	25.36	170.25	8.26	952	SA	5
1	600.32	145.26	98.32	2.86	23.69	18.26	7.26	1.61	149.15	196.26	11.48	615	SA	2
1	490.23	88.33	160.58	2.74	16.29	20.36	5.36	1.42	23.26	160.47	7.36	918	SA	5
1	390.23	90.12	161.23	2.63	18.44	18.26	6.25	1.11	24.36	150.45	6.69	512	SA	1
1	623.15	139.26	121.34	2.45	19.56	17.36	7.24	1.36	140.26	180.67	10.36	917	SA	5
1	399.34	55.36	164.36	2.88	16.59	16.26	6.26	1.25	145.59	160.26	7.26	932	SA	5
1	109.26	77.24	172.32	2.96	18.26	15.99	8.77	1.14	139.46	170.15	7.89	745	MERSA	4
1	477.26	87.23	166.23	0.49	18.26	20.36	9.26	1	140.89	174.19	8.26	530	SA	1
1	406.23	96.23	151.26	2.69	16.23	55.26	7.15	1.11	129.12	169.36	7.36	664	SA	3
1	476.28	53.99	152.36	2.74	17.26	20.34	6.25	1.2	25.21	155.26	3.74	612	SA	2
1	100.36	97.76	77.76	0.45	18.26	18.36	18.26	1.36	26.41	166.98	7.36	677	SA	3
1	107.26	102.23	170.11	0.46	8.26	42.36	17.26	1.22	128.25	171.36	6.87	501	SA	1
1	630.23	136.26	122.34	2.96	22.13	20.14	5.26	1.11	144.13	199.27	10.39	670	SA	3
1	107.65	53.88	158.12	2.85	14.43	22.44	6.36	1	135.23	150.39	8.74	777	SA	4
1	588.26	140.36	133.23	2.65	19.45	17.45	22.26	0.6	142.22	202.54	11.39	780	MERSA	4
1	650.36	141.36	129.32	2.58	19.36	17.44	5.36	0.59	150	188.79	10.39	782	SA	4
1	664.22	148.26	134.32	0.52	22.32	18.23	6.32	1.36	147.36	193.26	12.78	552	SA	1
1	380.34	98.11	177.32	2.96	20.32	16.48	4.25	1.33	145.15	169.32	8.49	945	MERSA	5
1	420.12	50.36	155.32	2.84	17.34	18.22	7.22	1.22	142.15	173.26	7.49	669	SA	3
1	512.66	101.54	159.72	2.63	18.26	17.44	8.45	1.34	135.26	160.36	7.85	919	MERSA	5
1	430.32	55.36	139.22	2.74	16.43	15.33	6.58	1.22	133.26	165.26	8.39	933	MERSA	5
1	620.41	145.23	119.23	2.66	22.67	16.44	9.22	0.09	26.22	200.26	10.78	940	SA	5
1	570.58	139.26	133.23	2.47	23.48	19.25	7.44	0.08	140.26	200.85	11.48	774	MERSA	4
1	450.32	120.12	158.23	2.69	18.33	18.99	6.33	1.11	144.84	170.26	7.48	551	SA	1
1	105.36	111.21	160.23	2.36	18.11	20.15	5.22	1.2	150.39	166.98	6.89	771	SA	4
1	390.32	96.23	80.26	2.82	17.23	15.66	17.44	1.36	139.26	175.26	7.88	921	SA	5
1	633.18	130.21	122.23	2.63	22.13	16.24	5.26	1.22	133.48	199.58	10.74	977	MERSA	5
1	611.47	134.26	130.23	2.53	24.54	17.25	6.25	0.09	140.96	189.36	11.59	960	SA	5
1	511.35	88.21	144.12	2.66	7.33	15.44	7.15	0.08	151.48	177.39	8.23	763	MERSA	4
1	487.16	52.36	160.23	0.51	18.22	15.22	9.22	0	154.26	165.26	8.47	660	SA	3
1	463.12	99.21	77.54	0.48	15.23	16.22	7.23	1.32	133.62	150.78	3.79	714	SA	4
1	399.29	112.12	167.15	2.96	17.66	20.11	8.55	1.35	144.59	152.48	7.44	512	SA	1
1	640.25	147.12	133.21	2.84	25.32	21.45	7.25	0.09	26.22	189.26	9.96	966	MERSA	5
1	102.23	103.21	188.23	2.66	17.22	20.14	6.33	0.08	25.69	170.26	6.78	770	SA	4
1	630.37	139.26	127.21	2.74	25.33	20.77	7.45	1.11	144.26	199.26	12.85	777	SA	4
1	544.32	105.12	150.42	2.77	19.23	21.64	6.88	1.23	147.36	160.29	3.45	666	SA	3
1	108.54	55.23	149.53	0.51	18.23	15.22	17.44	0.09	139.26	170.69	8.69	784	SA	4
1	532.89	88.12	160.23	0.52	18.26	16.22	5.26	1.33	138.48	172.15	8.79	765	SA	4
1	107.34	54.23	160.43	2.51	18.44	16.29	17.45	1.09	140.27	171.67	8.89	774	SA	3
1	630.37	139.26	127.21	2.74	25.33	20.77	7.45	1.11	144.26	199.26	12.85	777	SA	4
1	641.35	148.12	134.31	2.74	24.37	19.35	8.35	1.19	27.27	190.76	11.76	968	SA	2
